# Supplementary material for: Asymmetric electron occupation of transition metals for the oxygen evolution reaction via a ligand–metal synergistic strategy
Source: Royal Society of Chemistry journal article supplement (doi:10.1039/d4cp03185g), 2024-01-01

## Supporting Information

### **Asymmetric Electronic Structures of Transition Metals for Oxygen Evolution Reaction via Ligand-Metal Synergistic Strategy**

Pai Wang<sup>1</sup>, Kunyu Li<sup>1</sup>, Tongwei Wu<sup>1,2</sup>, Wei Ji<sup>1,3</sup>, Yanning Zhang<sup>1,2\*</sup>

<sup>1</sup> *Institute of Fundamental and Frontier Sciences, University of Electronic Science and Technology of China, Chengdu 611731, China*

<sup>2</sup> *Key Laboratory of Quantum Physics and Photonic Quantum Information, Ministry of Education, University of Electronic Science and Technology of China, Chengdu 611731, China*

<sup>3</sup> *Department of Physics, Renmin University of China, Beijing 100872, P. R. China.*

\*Correspondence to: [yanningz@uestc.edu.cn](mailto:yanningz@uestc.edu.cn)

**Fig. S1** | Schematic illustration of phen-Co@CoOOH orientation.

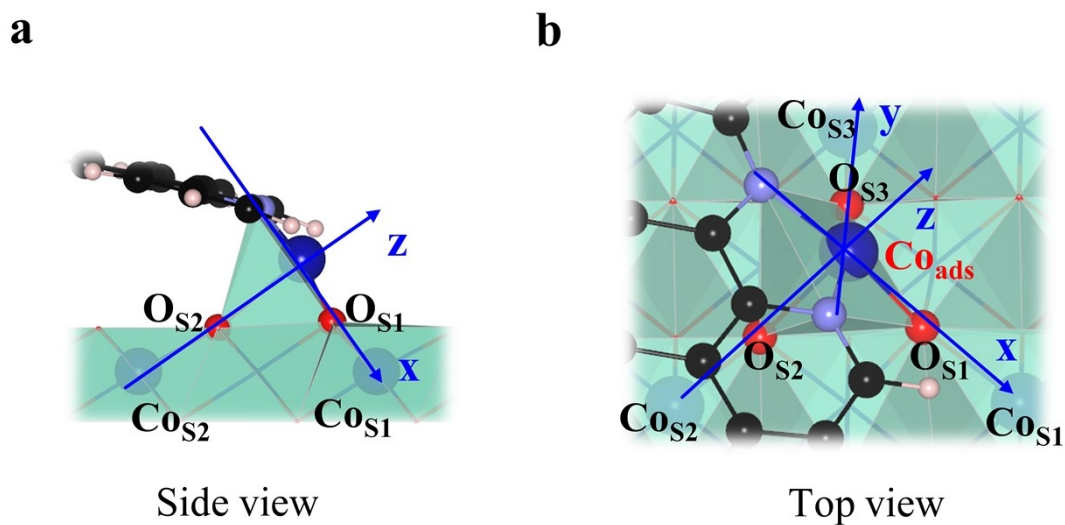

**Fig. S2** | Transition state search by climbing image NEB (CI-NEB) for RDS of (a) Co@CoOOH ( $\text{O}_2$  desorption) and (b) phen-Co@CoOOH ( $\text{OOH}^*$  formation), showing the initial state (IS), transition state (TS), and final state (FS), respectively.

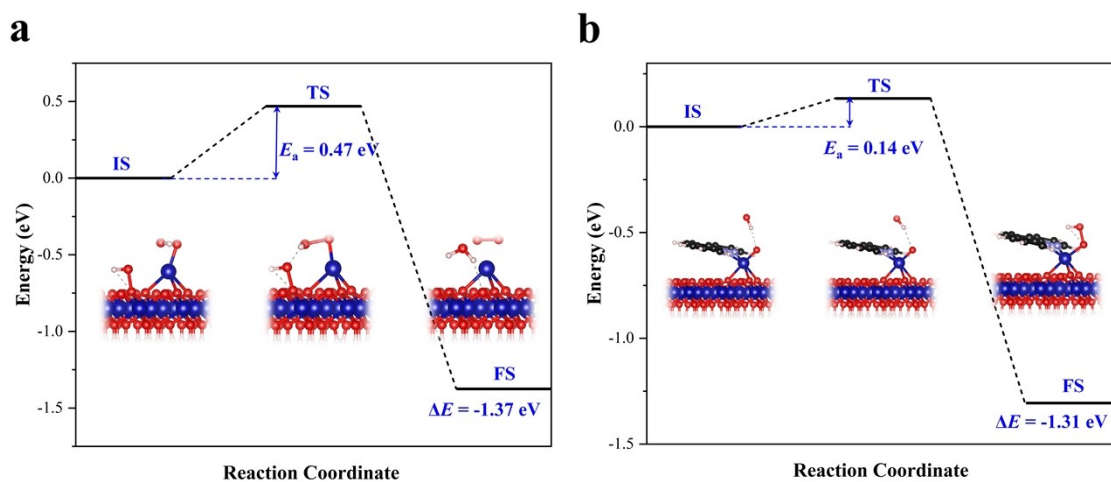

**Fig. S3** | Structural identification diagram of  $\text{Co}_{\text{ads}}$  and  $\text{Co}_{\text{S4}}$  including (a)  $\text{Co@CoOOH}$  and (b)  $\text{phen-Co@CoOOH}$ .

**a**

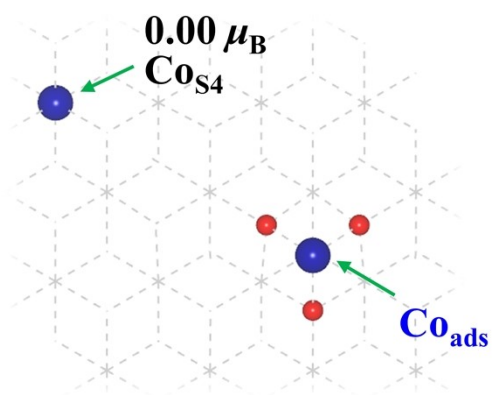

**b**

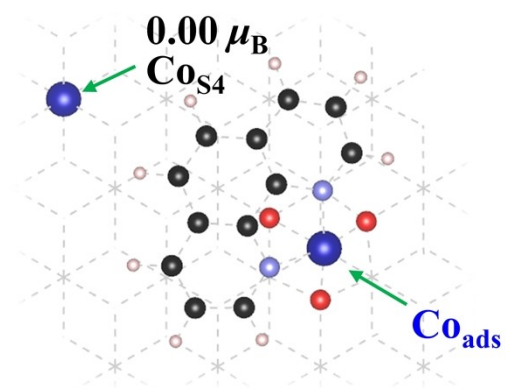

**Table S1 | Summaries of the bonding information** for Co@CoOOH and phen-Co@CoOOH two systems. The Co-O  $\overline{s_{123}}$  represents the average bond length of Co<sub>ads</sub>-O<sub>S1-S3</sub>

|               |      | Bond Length /Å     |                    |                    |                           |       |                   |                   |
|---------------|------|--------------------|--------------------|--------------------|---------------------------|-------|-------------------|-------------------|
| Complex       |      | Co-O <sub>S1</sub> | Co-O <sub>S2</sub> | Co-O <sub>S3</sub> | Co-O $\overline{s_{123}}$ | Co-O* | Co-N <sub>1</sub> | Co-N <sub>2</sub> |
| Co@CoOOH      | Slab | 1.985              | 1.948              | 1.949              | 1.961                     | --    | --                | --                |
|               | OH*  | 1.984              | 2.376              | 2.083              | 2.148                     | 1.778 | --                | --                |
|               | O*   | 2.183              | 2.183              | 1.996              | 2.121                     | 1.627 | --                | --                |
|               | OOH* | 2.131              | 1.989              | 2.220              | 2.113                     | 1.816 | --                | --                |
| phen-Co@CoOOH | Slab | 1.954              | 2.279              | 1.931              | 2.055                     | --    | 1.944             | 1.934             |
|               | OH*  | 2.007              | 2.114              | 1.986              | 2.036                     | 1.809 | 1.930             | 1.924             |
|               | O*   | 2.098              | 2.281              | 2.162              | 2.180                     | 1.616 | 2.105             | 2.043             |
|               | OOH* | 1.983              | 1.971              | 1.960              | 1.971                     | 1.830 | 1.976             | 1.932             |

**Table S2 | Summaries of local environments, occupation and Co-L bond information** of Co<sub>ads</sub> for phen-Co@CoOOH system.

| Complex | Local environment | Occupation                                        | Co-L (1)<br>(z-axis ave) /Å | Co-L (2)<br>(xy-axis ave) /Å | Difference<br>(1)-(2) /Å | Jahn-Teller effect |
|---------|-------------------|---------------------------------------------------|-----------------------------|------------------------------|--------------------------|--------------------|
| Slab    | square pyramid    | $d_{xy}^2 d_{yz}^2 d_{xz}^2 d_{z2}^1 d_{x2-y2}^0$ | 2.279                       | 1.941                        | 0.34                     | z-in elongation    |
| OH*     | Octahedra         | $d_{xy}^2 d_{yz}^2 d_{xz}^2 d_{z2}^0 d_{x2-y2}^0$ | 1.962                       | 1.962                        | -0.00                    | no elongation      |
| O*      | Octahedra         | $d_{xy}^2 d_{yz}^1 d_{xz}^1 d_{x2-y2}^1 d_{z2}^0$ | 1.949                       | 2.102                        | -0.15                    | z-in compression   |
| OOH*    | Octahedra         | $d_{xy}^2 d_{yz}^2 d_{xz}^2 d_{z2}^0 d_{x2-y2}^0$ | 1.901                       | 1.963                        | -0.06                    | no elongation      |

**Fig. S4 | The calculated partial density of states (PDOS) of the adsorption site  $\text{Co}_{\text{ads}}$ - $3d$  orbitals for (a-c) its three OER intermediates in phen-Co@CoOOH system.**

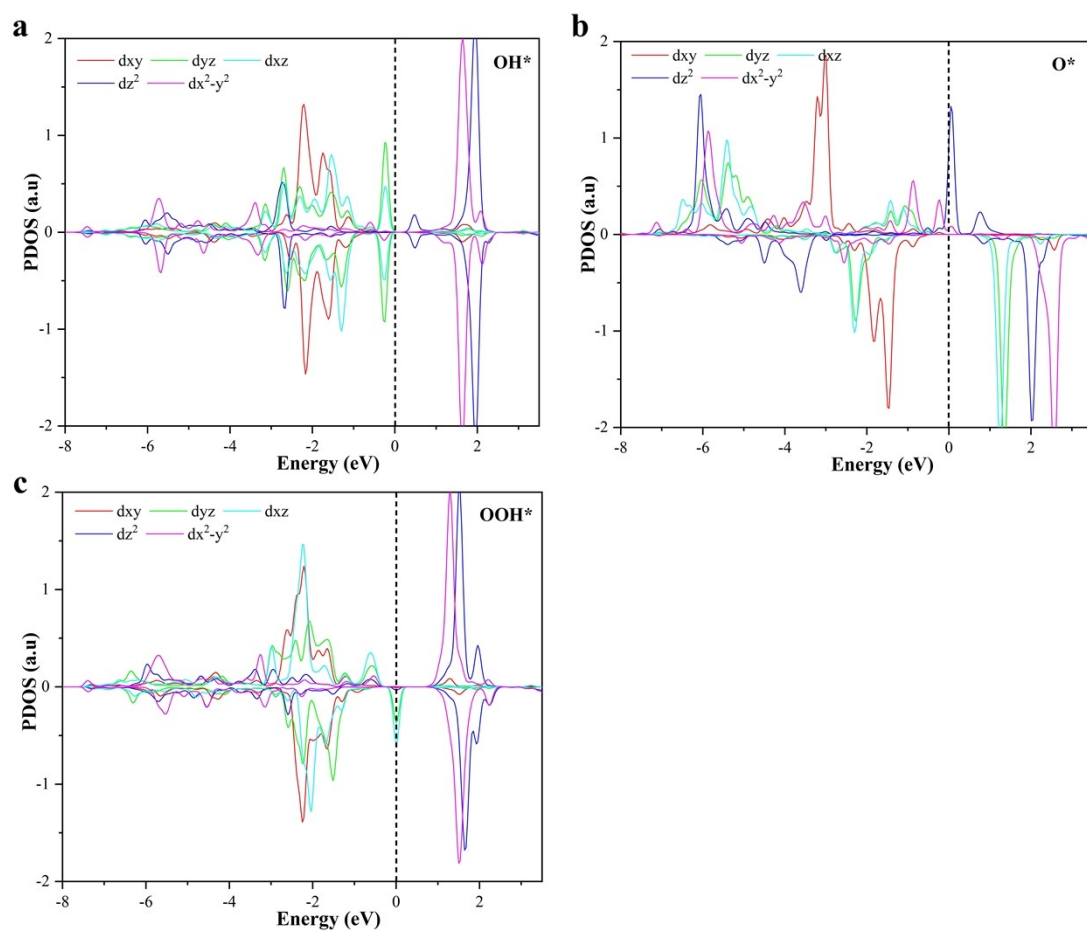

**Fig. S5 | The calculated partial density of states (PDOS) and schematic diagrams of the adsorption site  $\text{Co}_{\text{ads}}-3d$  orbitals for (a-d)  $\text{Co@CoOOH}$  and its three OER intermediates. Spin electron occupations of  $d$ -orbitals are denoted as short arrows.**

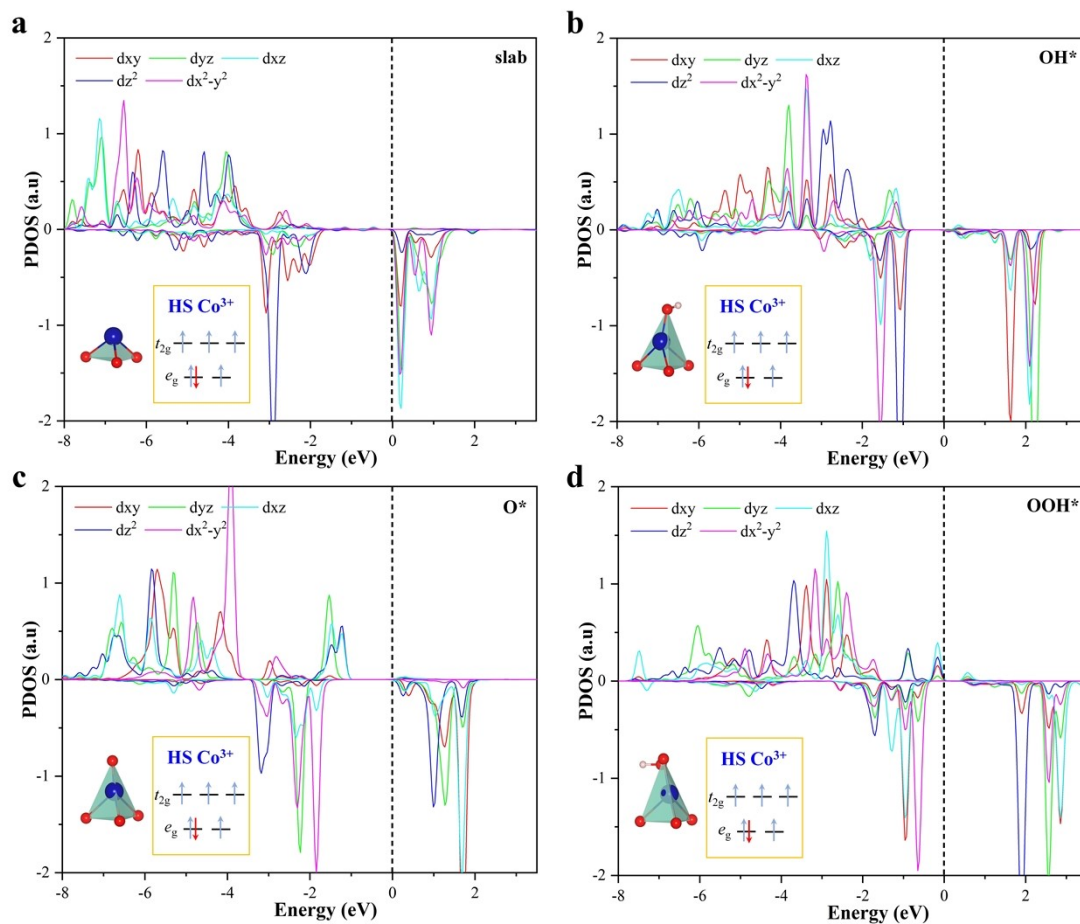

**Fig. S6 | The calculated partial density of states (PDOS) and schematic diagrams of the adsorption site  $\text{Co}_{\text{ads}}-3d$  orbitals for (a-d) bpy-Co@CoOOH and its three OER intermediates. Spin electron occupations of  $d$ -orbitals are denoted as short arrows.**

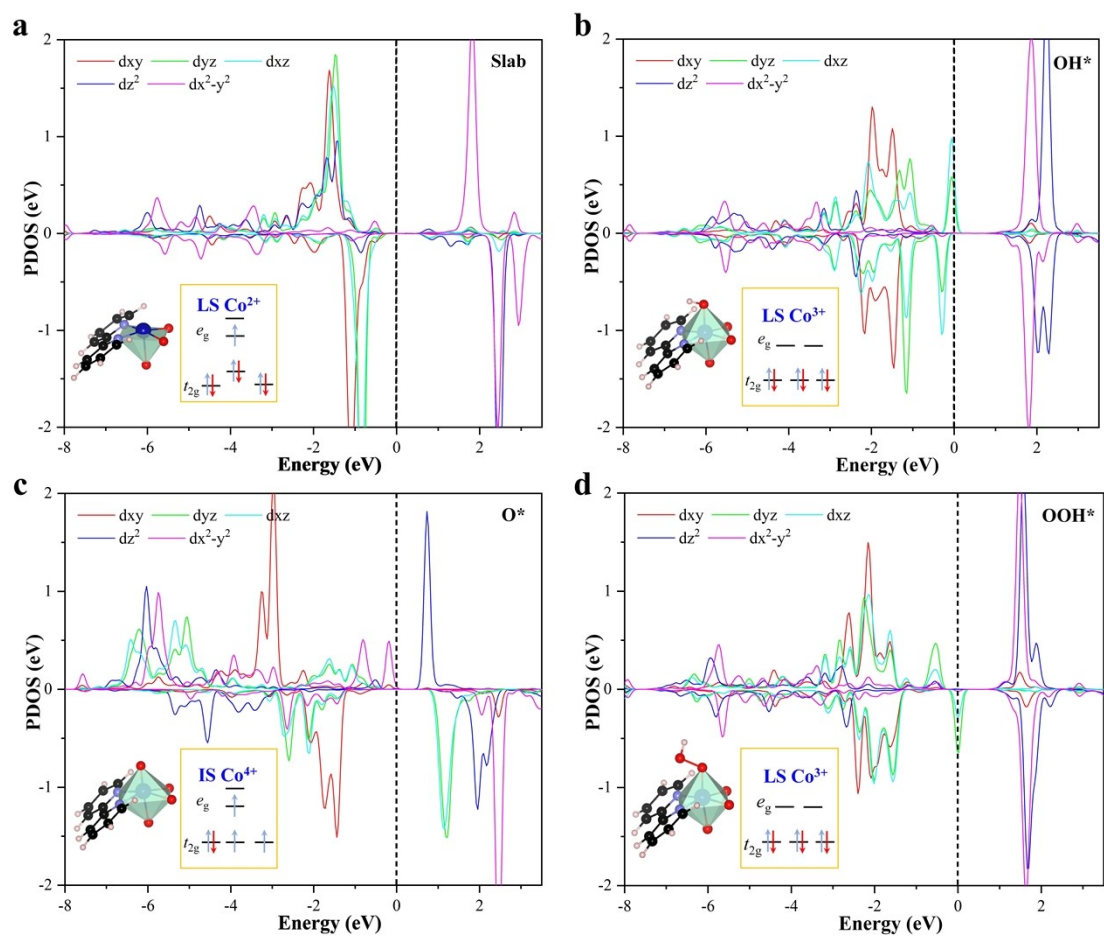

**Fig. S7** | Differential charge density. The cyan and yellow colors indicate electron depletion and accumulation, respectively, with an iso-surface value of 0.006 e/Bohr<sup>3</sup> for (a) bpy-Ni@NiOOH; (e) phen-Ni@NiOOH. Sideview of three systems to present the bond and distance information between the ligand and substrate: (b) bpy-Ni@NiOOH; (f) phen-Ni@NiOOH; (i) phen-Co@CoOOH. The Spin density, the iso-surface value is 0.035 e/Bohr<sup>3</sup> for (c) bpy-Ni@NiOOH; (g) phen-Ni@NiOOH. The electronic arrangement of metal site for (d) bpy-Ni@NiOOH; (h) phen-Ni@NiOOH.

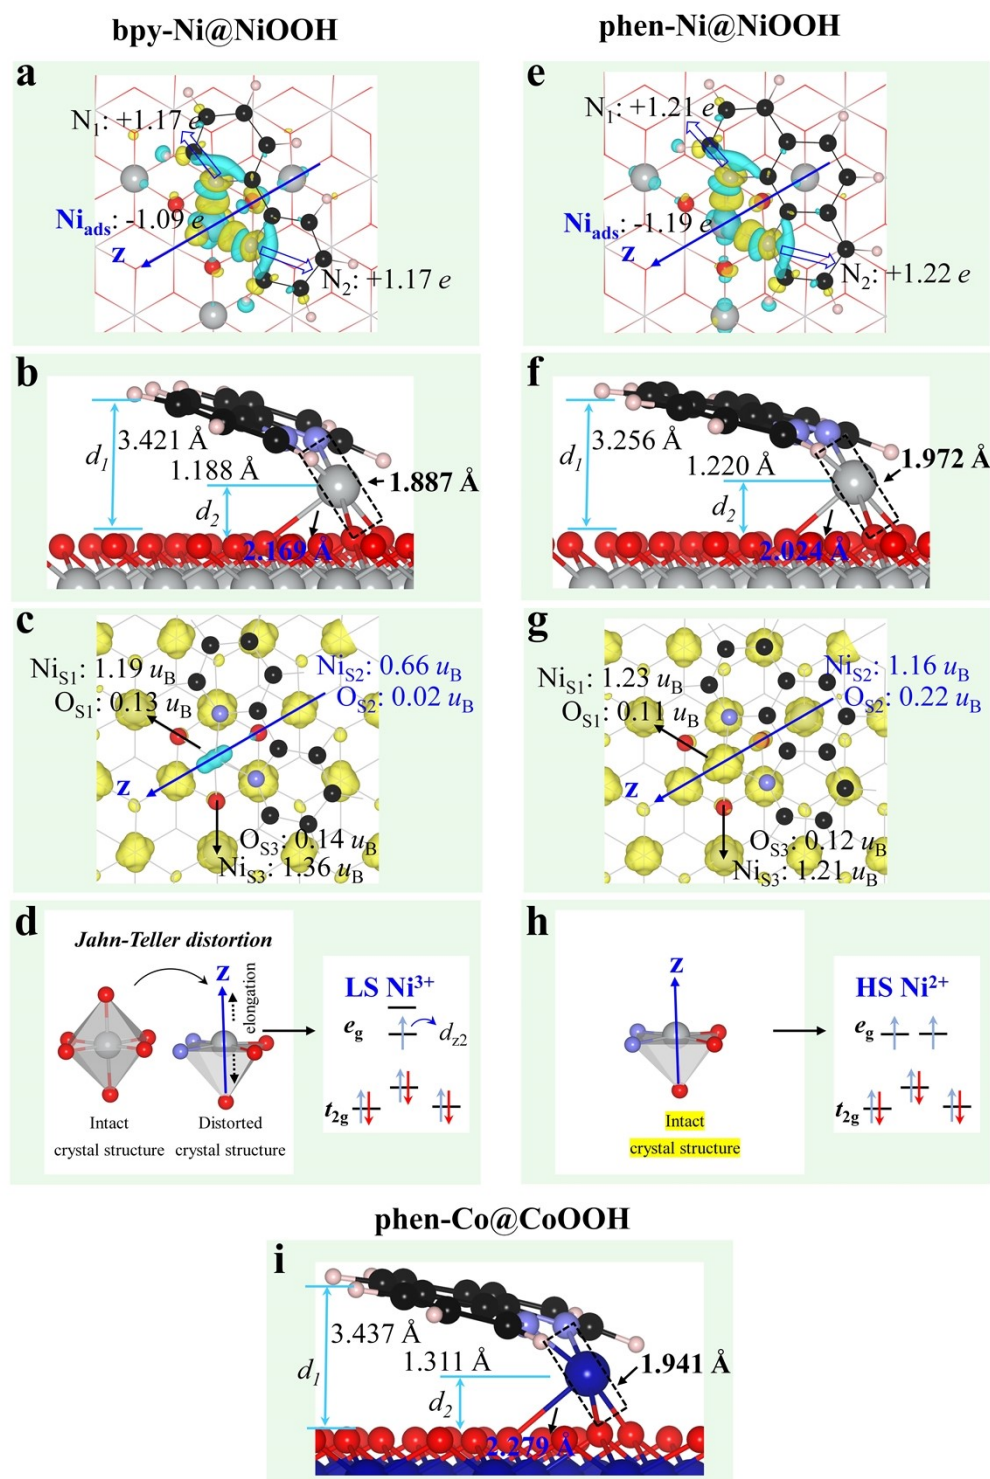

**Fig. S8 | The calculated partial density of states (PDOS) and schematic diagrams of the adsorption site  $3d$  orbitals for (a) CoOOH; (b) Co@CoOOH; (c) phen-Co@CoOOH; (d) bpy-Co@CoOOH; (e) bpy-Ni@NiOOH; (f) phen-Ni@NiOOH. Spin electron occupations of  $d$ -orbitals are denoted as short arrows.**

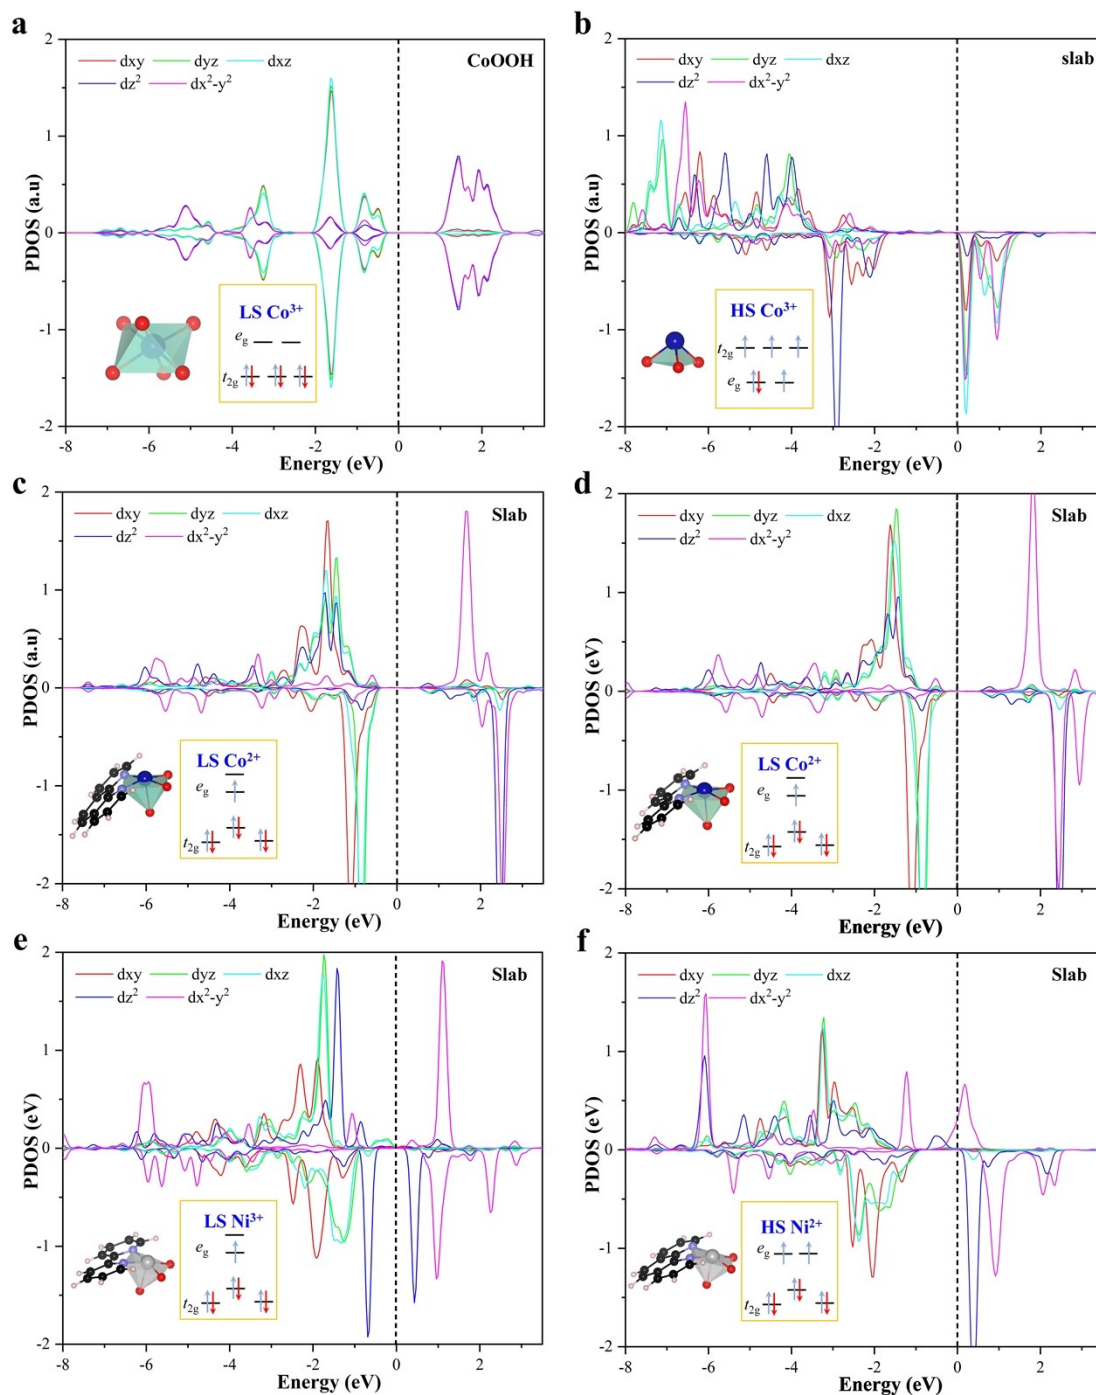

**Fig. S9 | Calculated surface charge transfer ( $q$ ) and work function ( $\Phi$ ) at IS, TS and FS for studied electrochemical steps RDS of (a) Co@CoOOH ( $O_2$  desorption) and (b) phen-Co@CoOOH ( $OOH^*$  formation), respectively.**

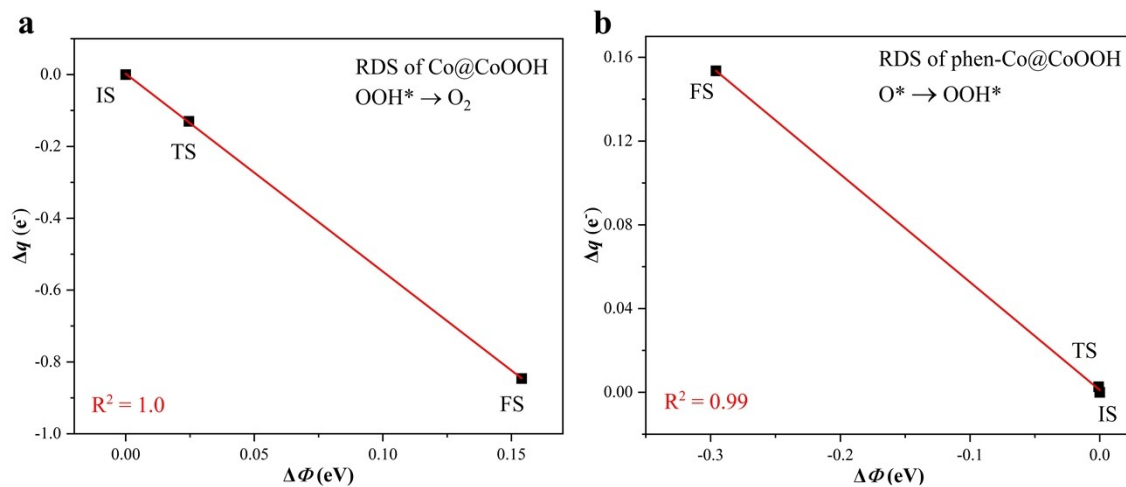

**Fig. S10 | RDS Structure diagram** for phen-Co@CoOOH using an explicit solvent model.

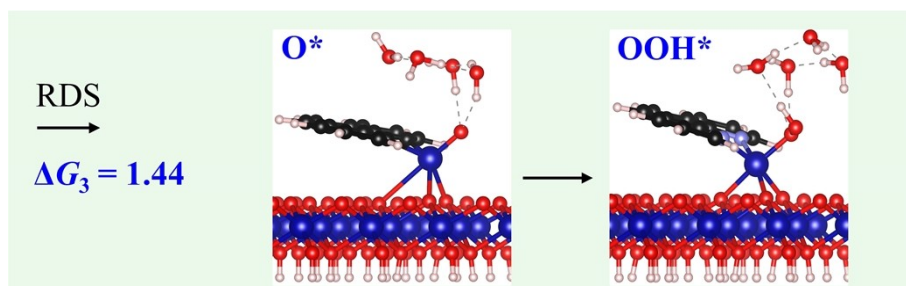

Supplement: d4cp03185g1.pdf [file d4cp03185g1.pdf]
